# Supplementary material for: Application of an integrated physical and functional screening approach to identify inhibitors of the Wnt pathway
Source: PubMed Central journal article supplement — Mol Syst Biol. 2009 Oct 13;5:315. doi: 10.1038/msb.2009.72 (PMC2779086; doi:10.1038/msb.2009.72), 2009-10-13
Supplement: msb200972-s1.pdf [file msb200972-s1.pdf]

## **SUPPLEMENTARY MATERIALS**

*for Miller et al., 2009*

### **LIST OF SUPPLEMENTARY FIGURES, TABLES AND DATA SETS**

**Supplementary Figure 1:** Manual LUMIER testing of luciferase-tagged baits.

**Supplementary Figure 2:** Ube2m is a Wnt pathway component.

**Supplementary Figure 3:** Nkd1 cooperates with Axin1 to inhibit Wnt signaling.

**Supplementary Table 1:** Verification ratio by manual LUMIER.

**Supplementary Table 2:** False negative rate of protein interaction screen.

**Supplementary Table 3:** Verification of LUMIER screen interactions.

**Supplementary Table 4:** Detection of indirect interactions by LUMIER.

**Supplementary Table 5:** True positive and corresponding maximum false positive rates for CPS, LUMIER, cDNA and RNAi

**Data Set 1:** Primary screen data (fold-over median). (*Excel Spreadsheet*)

**Data Set 2:** Positive and negative groups. (*Excel Spreadsheet*)

**Data Set 3:** Combined Pathway Scores (CPS). (*Excel Spreadsheet*)

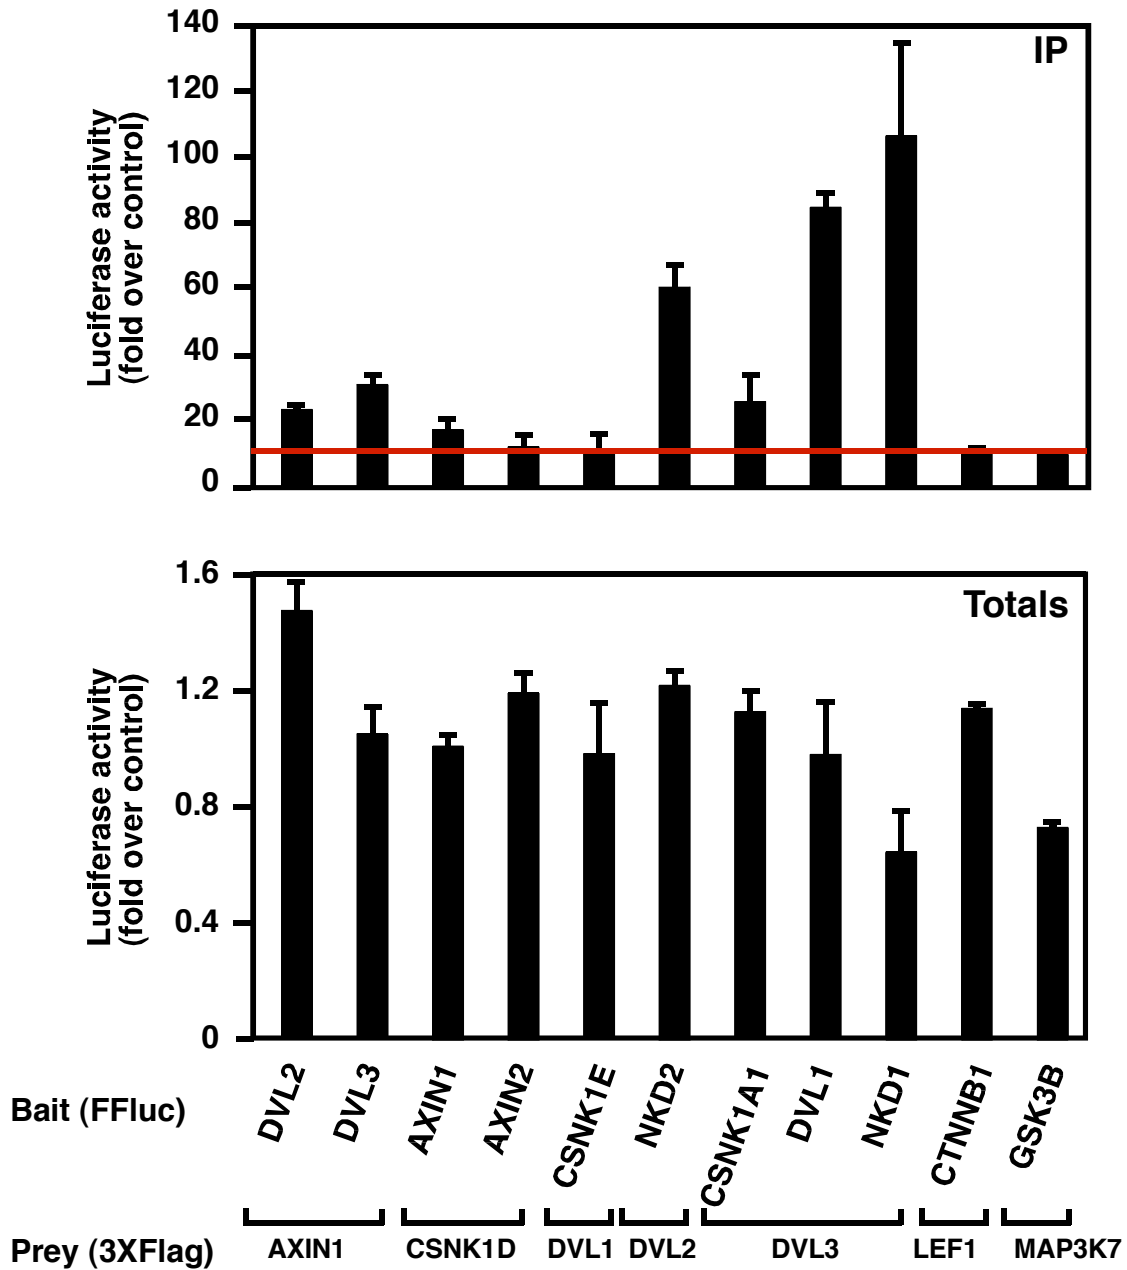

**Supplementary Figure 1: Manual LUMIER testing of luciferase-tagged baits.** HEK293T cells were transfected with the indicated Firefly luciferase tagged baits in the presence and absence of Flag-tagged preys and interactions were detected using the LUMIER assay. Bait expressed in the absence of prey was used as a control and data are expressed as fold over control +/- standard deviation. The 10-fold over control threshold is indicated (red line).

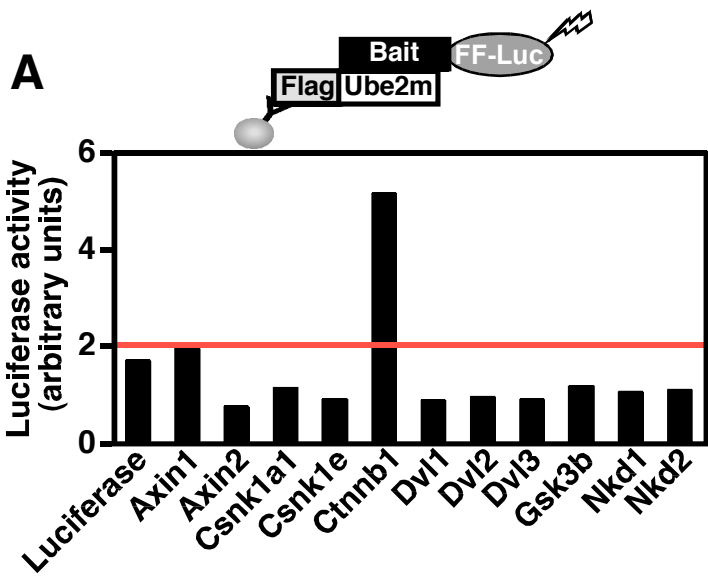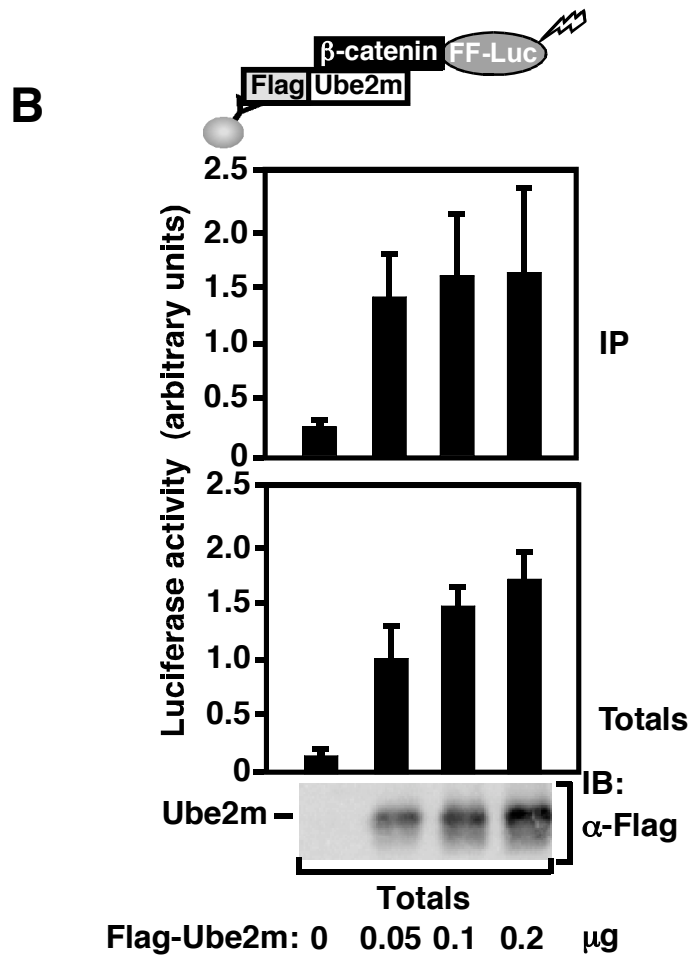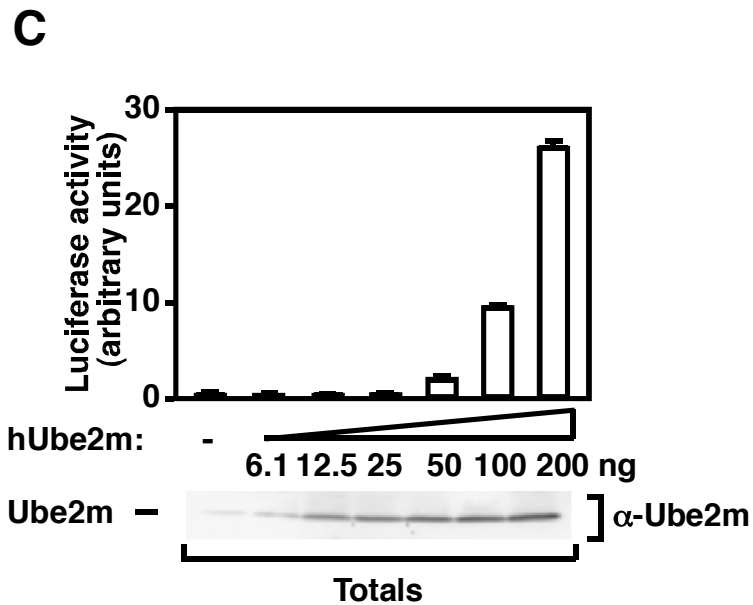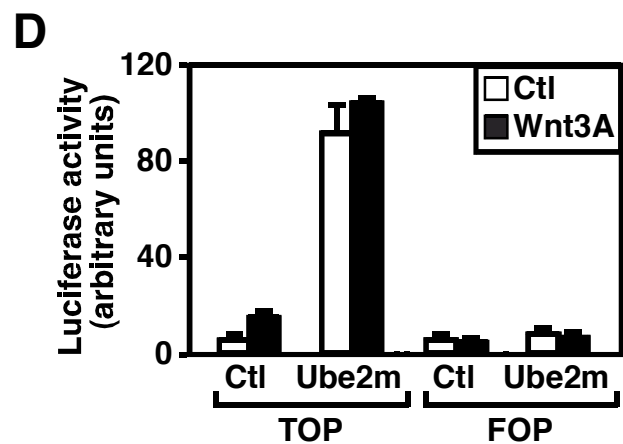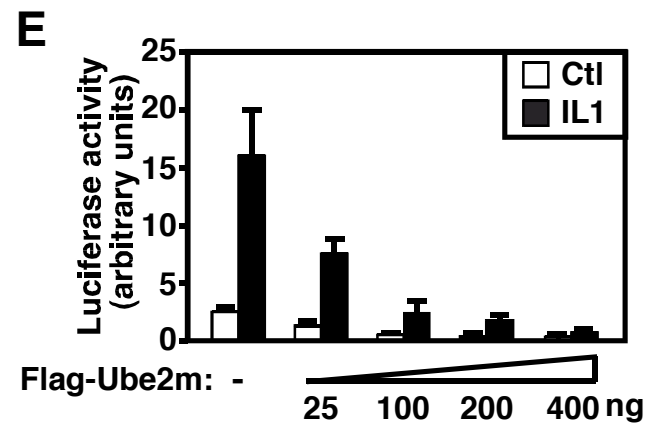

**Supplementary Figure 2: Ube2m is a Wnt pathway component.** (A) Detection of Ube2m interacting partners by high-throughput LUMIER. Data from a LUMIER screen (Figure 2) are presented as the average fold change over the plate median from single (luciferase alone) or triplicate (all other) runs. The 2-fold threshold is indicated (red line). (B) Ube2m interacts with  $\beta$ -catenin. HEK293T cells were transfected with Flag-Ube2m and  $\beta$ -catenin tagged with Firefly luciferase ( $\beta$ -catenin.FF). Following anti-Flag immunoprecipitation,  $\beta$ -catenin.FF was detected by luciferase assay. Data are shown as the mean of triplicates  $\pm$  standard deviation. (C-E) HEK293T cells were transfected with TOPflash (C, D), FOPflash (D) or pNF-kB-Luc (E) reporters with human Ube2m (hUbe2m) or Flag-tagged mouse Ube2m (Flag-Ube2m) as indicated. Cells were unstimulated or stimulated with Wnt3A or Interleukin 1 (IL1) overnight. Promoter activity was measured by luciferase assay and the data are shown as the mean of triplicate samples  $\pm$  standard deviation. (C) Increased human Ube2m expression activates TOPflash. (D) Ube2m does not activate FOPflash. (E) Increasing Ube2m expression inhibits an NFkB responsive promoter.

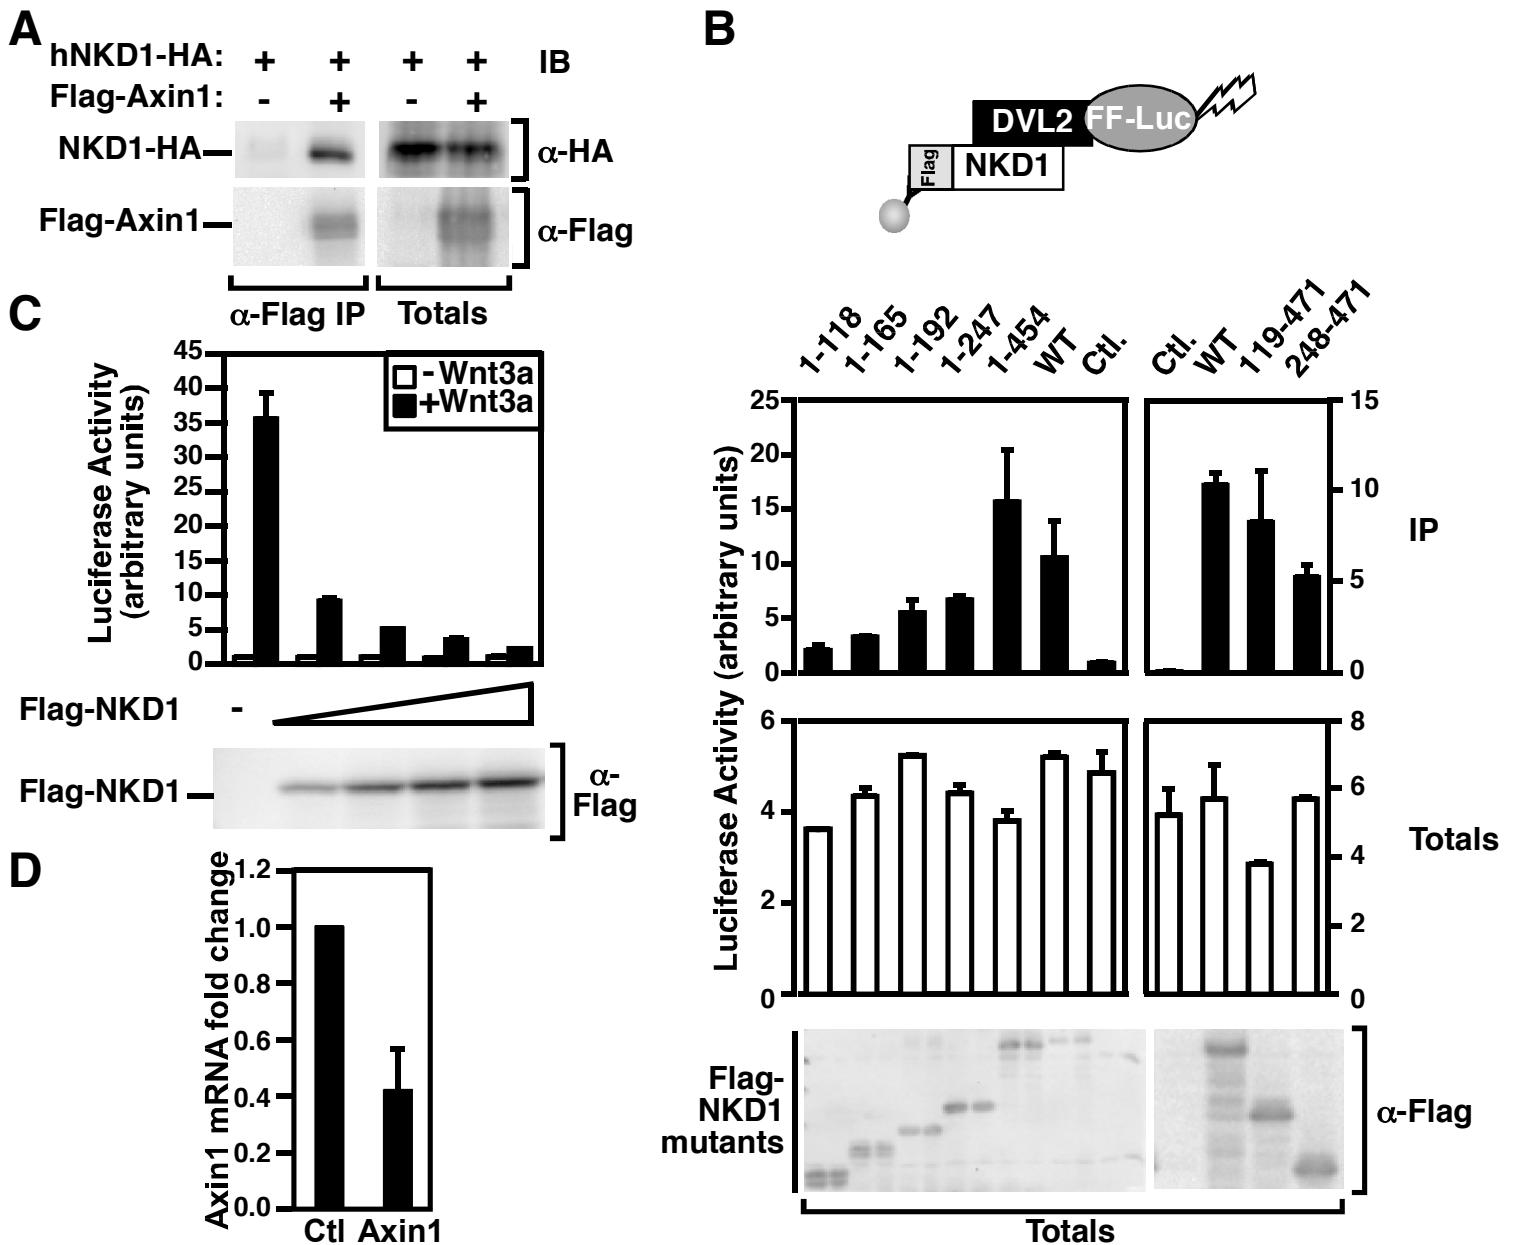

**Supplementary Figure 3: Nkd1 cooperates with Axin1 to inhibit Wnt signaling.** (A) HEK293T cells were transfected with Nkd1-HA in the presence and absence of 3XFlag-Axin1. Cell lysates were subject to anti-Flag immunoprecipitation and associated Nkd1 was detected by anti-HA immunoblotting. (B) Internal regions of Nkd1 are required for its association with Dvl2. HEK293T cells were transfected with luciferase tagged Dvl2 and the indicated Flag-tagged Nkd1 constructs. Cell lysates were subject to Flag immunoprecipitation and the presence of Dvl2 was assessed by luciferase assay. Data are expressed as the mean of 2 samples +/- range. (C) Nkd1 overexpression inhibits TOPflash activation by Wnt3A. HEK293T cells were transfected with TOPflash and varying amounts of Nkd1 (0 to 0.28 mg in 24 well plates). TOPflash activity was measured by luciferase assay. Data are shown as the mean of 2 samples +/- standard deviation. (D) Measurement of siRNA mediated knockdown of Axin1. HEK293T cells were transfected with 20 nM of siRNA targetting Axin1 or non-targetting control siRNA. Axin1 levels were measured by real time PCR and normalised to HPRT. Data are expressed as fold over control and are shown as the average of three independent experiments +/- SEM.

**Supplementary Table 1: Verification frequency by manual LUMIER**

| <b>Average mLIR</b> | <b>Number tested manually</b> | <b>Number positive<sup>1</sup></b> | <b>Success rate (%)</b> | <b>Cumulative number tested</b> | <b>Cumulative number positive</b> | <b>Cumulative success (%)</b> |
|---------------------|-------------------------------|------------------------------------|-------------------------|---------------------------------|-----------------------------------|-------------------------------|
| >4.00               | 23                            | 22                                 | 96                      | 23                              | 22                                | 96                            |
| 3.00-3.99           | 8                             | 6                                  | 75                      | 31                              | 28                                | 90                            |
| 2.00-2.99           | 17                            | 11                                 | 65                      | 48                              | 39                                | 81                            |
| 1.00-1.99           | 20                            | 9                                  | 45                      | 68                              | 48                                | 71                            |
| <1.00               | 20                            | 2                                  | 10                      | 88                              | 50                                | 57                            |

1) Proteins with luciferase activities of at least 3-fold over control were considered positive.

**Supplementary Table 2: False negative rate of protein interaction screen.**

| Protein 1 <sup>1</sup>     | Protein 2 | Average mLIR <sup>2</sup> |                  |                  |                  |                  |
|----------------------------|-----------|---------------------------|------------------|------------------|------------------|------------------|
|                            |           | >4                        | >3               | >2               | >1.5             | >1               |
| AXIN1                      | ANKRD6    | Y                         | Y                | Y                | Y                | Y                |
| AXIN1                      | AXIN1     | Y                         | Y                | Y                | Y                | Y                |
| AXIN1                      | CDK2      | N                         | N                | N                | N                | N                |
| AXIN1                      | DAB2      | N                         | N                | N                | N                | N                |
| AXIN1                      | DVL2      | Y                         | Y                | Y                | Y                | Y                |
| AXIN1                      | PIAS1     | N                         | N                | N                | N                | Y                |
| AXIN1                      | SENP2     | N                         | N                | N                | N                | Y                |
| AXIN1                      | SMAD3     | N                         | N                | N                | Y                | Y                |
| AXIN1                      | SMAD6     | N                         | N                | N                | N                | N                |
| AXIN1                      | SMAD7     | N                         | N                | N                | N                | N                |
| AXIN2                      | ANKRD6    | Y                         | Y                | Y                | Y                | Y                |
| CSNK1A1                    | AXIN1     | Y                         | Y                | Y                | Y                | Y                |
| CSNK1E                     | ANKRD6    | Y                         | Y                | Y                | Y                | Y                |
| CSNK1E                     | AXIN1     | Y                         | Y                | Y                | Y                | Y                |
| CSNK1E                     | DVL1      | Y                         | Y                | Y                | Y                | Y                |
| CSNK1E                     | DVL3      | Y                         | Y                | Y                | Y                | Y                |
| CTNNB1                     | AXIN1     | Y                         | Y                | Y                | Y                | Y                |
| CTNNB1                     | AXIN2     | Y                         | Y                | Y                | Y                | Y                |
| CTNNB1                     | BTRC      | Y                         | Y                | Y                | Y                | Y                |
| CTNNB1                     | CDK2      | N                         | N                | N                | N                | N                |
| CTNNB1                     | CSNK1A1   | Y                         | Y                | Y                | Y                | Y                |
| CTNNB1                     | CTNNB1    | Y                         | Y                | Y                | Y                | Y                |
| CTNNB1                     | CTNNBIP1  | Y                         | Y                | Y                | Y                | Y                |
| CTNNB1                     | DVL2      | N                         | N                | Y                | Y                | Y                |
| CTNNB1                     | DVL3      | Y                         | Y                | Y                | Y                | Y                |
| CTNNB1                     | FHL2      | N                         | N                | N                | N                | Y                |
| CTNNB1                     | GSK3B     | N                         | N                | N                | N                | Y                |
| CTNNB1                     | LEF1      | Y                         | Y                | Y                | Y                | Y                |
| CTNNB1                     | MAGI2     | N                         | N                | Y                | Y                | Y                |
| CTNNB1                     | NCOA2     | N                         | N                | N                | N                | Y                |
| CTNNB1                     | PCP2      | N                         | N                | N                | N                | N                |
| CTNNB1                     | PIN1      | N                         | N                | N                | N                | Y                |
| CTNNB1                     | PKP2      | N                         | N                | N                | N                | Y                |
| CTNNB1                     | PTEN      | N                         | N                | Y                | Y                | Y                |
| CTNNB1                     | SMAD7     | N                         | N                | N                | N                | Y                |
| CTNNB1                     | TAX1BP3   | N                         | Y                | Y                | Y                | Y                |
| CTNNB1                     | TCF7      | Y                         | Y                | Y                | Y                | Y                |
| DVL1                       | AXIN1     | Y                         | Y                | Y                | Y                | Y                |
| DVL1                       | CSNK2A2   | N                         | N                | Y                | Y                | Y                |
| DVL1                       | DVL1      | Y                         | Y                | Y                | Y                | Y                |
| DVL1                       | DVL3      | Y                         | Y                | Y                | Y                | Y                |
| DVL1                       | FRAT1     | N                         | N                | N                | N                | N                |
| DVL1                       | PAK1      | N                         | Y                | Y                | Y                | Y                |
| DVL1                       | RAC1      | N                         | N                | N                | N                | Y                |
| DVL1                       | SMAD1     | N                         | N                | N                | N                | N                |
| DVL2                       | ARRB2     | N                         | N                | N                | N                | N                |
| DVL2                       | CSNK2A2   | N                         | Y                | Y                | Y                | Y                |
| DVL2                       | RAC1      | N                         | N                | N                | N                | N                |
| DVL2                       | RHOA      | N                         | N                | Y                | Y                | Y                |
| DVL3                       | DAB2      | N                         | N                | N                | N                | N                |
| GSK3B                      | AXIN1     | Y                         | Y                | Y                | Y                | Y                |
| GSK3B                      | AXIN2     | Y                         | Y                | Y                | Y                | Y                |
| GSK3B                      | DVL2      | N                         | Y                | Y                | Y                | Y                |
| GSK3B                      | DVL3      | N                         | N                | Y                | Y                | Y                |
| GSK3B                      | FRAT1     | Y                         | Y                | Y                | Y                | Y                |
| GSK3B                      | FRAT2     | N                         | N                | N                | N                | N                |
| GSK3B                      | TP53      | N                         | N                | N                | N                | N                |
| NKD1                       | DVL1      | Y                         | Y                | Y                | Y                | Y                |
| <b>False negative rate</b> |           | <b>33/58=57%</b>          | <b>29/58=50%</b> | <b>23/58=40%</b> | <b>22/58=38%</b> | <b>13/58=22%</b> |
| <b>Total interactions</b>  |           | <b>230</b>                | <b>395</b>       | <b>945</b>       | <b>1717</b>      | <b>3723</b>      |
| <b>Total interactions</b>  |           | <b>211</b>                | <b>358</b>       | <b>829</b>       | <b>1509</b>      | <b>3407</b>      |

**1)** Listed interactions were identified from literature searches using immunoprecipitation from mammalian cell lysates in multiple reports, or in a single report published since 2002.

**2)** Detection (Y) or not (N) of interactions at the indicated thresholds in the protein interaction screen are shown.

**Supplementary Table 3: Verification of LUMIER screen interactions**

| Protein1 | Protein2 | LUMIER <sup>1</sup> | IP-Western <sup>1</sup> | Mass Spectrometry <sup>2, 3</sup> |
|----------|----------|---------------------|-------------------------|-----------------------------------|
| AXIN1    | CSNK1A1  |                     |                         | +                                 |
| AXIN1    | CSNK1D   | +                   |                         |                                   |
| AXIN1    | CTNNB1   |                     |                         | +                                 |
| AXIN1    | ENC1     | +                   |                         |                                   |
| AXIN1    | GSK3A    |                     |                         | +                                 |
| AXIN1    | GSK3B    |                     |                         | +                                 |
| AXIN1    | KIAA103  | +                   |                         |                                   |
| AXIN1    | SOCS6    | +                   |                         |                                   |
| AXIN1    | TAX1BP3  | +                   |                         |                                   |
| AXIN1    | WWTR1    |                     | +                       |                                   |
| AXIN2    | CSNK1D   | +                   |                         |                                   |
| CSNK1A1  | DVL1     | +                   |                         |                                   |
| CSNK1A1  | DVL3     | +                   |                         |                                   |
| CTNNB1   | AXIN2    |                     |                         | +                                 |
| CTNNB1   | CTNNBIP1 |                     |                         | +                                 |
| CTNNB1   | FRAT2    | +                   |                         |                                   |
| CTNNB1   | LEF1     |                     |                         | +                                 |
| CTNNB1   | NKD2     | +                   |                         |                                   |
| CTNNB1   | PIAS1    | +                   |                         |                                   |
| CTNNB1   | PPP2CB   | +                   |                         |                                   |
| CTNNB1   | UBE2M    | +                   |                         |                                   |
| CTNNB1   | WWTR1    |                     | +                       |                                   |
| DVL1     | ING2     | +                   |                         |                                   |
| DVL1     | LOC51035 | +                   |                         |                                   |
| DVL1     | PLEKHB1  | +                   |                         |                                   |
| DVL1     | SMAD6    | +                   |                         |                                   |
| DVL1     | SQSTM1   | +                   |                         |                                   |
| DVL1     | STAT1    | +                   |                         |                                   |
| DVL1     | STUB1    | +                   |                         |                                   |
| DVL1     | WWTR1    |                     | +                       |                                   |
| DVL2     | CSNK1E   |                     |                         | +                                 |
| DVL2     | DVL3     |                     |                         | +                                 |
| DVL2     | NKD1     | +                   |                         | +                                 |
| DVL2     | NKD2     | +                   |                         |                                   |
| DVL2     | NKD2-v1  | +                   |                         |                                   |
| DVL2     | PARD6A   |                     | +                       |                                   |
| DVL2     | SMURF2   |                     | +                       |                                   |
| DVL2     | WWTR1    |                     | +                       |                                   |
| DVL3     | CSNK1D   | +                   |                         |                                   |
| DVL3     | CSNK2A2  |                     |                         | +                                 |
| DVL3     | NKD1     | +                   |                         |                                   |
| DVL3     | NKD2     | +                   |                         |                                   |
| DVL3     | NKD2-v1  | +                   |                         |                                   |
| DVL3     | WWTR1    |                     | +                       |                                   |
| GSK3B    | MAP3K7   | +                   |                         |                                   |
| GSK3B    | SMURF1   |                     | +                       |                                   |
| NKD1     | AXIN1    | +                   | +                       |                                   |
| NKD1     | AXIN2    | +                   |                         |                                   |
| NKD1     | NKD1     | +                   |                         |                                   |
| NKD1     | PAK1     | +                   |                         |                                   |
| NKD1     | PARD6    | +                   |                         |                                   |
| NKD1     | PLEKHA2  | +                   |                         |                                   |
| NKD1     | PLEKHB1  | +                   |                         |                                   |
| NKD1     | SQSTM1   | +                   |                         |                                   |
| NKD2     | AXIN1    | +                   |                         |                                   |
| NKD2     | MAP3K7   | +                   |                         |                                   |
| NKD2     | NKD1     | +                   |                         |                                   |
| NKD2     | NKD2     | +                   |                         |                                   |

1) This study

2) Angers S, Thorpe CJ, Biechele TL, Goldenberg SJ, Zheng N, MacCoss, MJ, Moon RT (2006) The KLHL12-Cullin-3 ubiquitin ligase negatively regulates the Wnt-beta-catenin pathway by targeting Dishevelled for degradation. *Nat Cell Biol* **8**: 348-357

3) Major MB, Camp ND, Berndt JD, Yi X, Goldenberg SJ, Hubbert C, Biechele TL, Gingras AC, Zheng N, Maccoss MJ, Angers S, Moon RT (2007) Wilms tumor suppressor WTX negatively regulates WNT/beta-catenin signaling. *Science* **316**: 1043-1046



**Supplementary Table 4: Detection of indirect interactions by LUMIER.**

|           |           | Average mLIR |    |    |      |           |
|-----------|-----------|--------------|----|----|------|-----------|
| Protein 1 | Protein 2 | >4           | >3 | >2 | >1.5 | Reference |
| CTNNB1    | ACP1      | No           | No | No | Yes  | 1         |
| GSK3B     | ANKRD6    | No           | No | No | No   | 2         |
| CTNNB1    | PPM1A     | No           | No | No | No   | 3         |
| DVL3      | PPM1A     | No           | No | No | No   | 3         |
| AXIN1     | AKT1      | No           | No | No | No   | 4         |
| DVL1      | CTNNB1    | No           | No | No | No   | 5         |
| DVL1      | GSK3B     | No           | No | No | No   | 6         |

**1)** Brady-Kalnay SM, Rimm DL, Tonks NK (1995) Receptor protein tyrosine phosphatase PTPmu associates with cadherins and catenins in vivo. *J Cell Biol* **130**: 977-986

**2)** Schwarz-Romond T, Asbrand C, Bakkers J, Kuhl M, Schaeffer HJ, Huelsenken J, Behrens J, Hammerschmidt M, Birchmeier W (2002) The ankyrin repeat protein Diversin recruits Casein kinase Iepsilon to the beta-catenin degradation complex and acts in both canonical Wnt and Wnt/JNK signaling. *Genes Dev* **16**: 2073-2084

**3)** Strovel ET, Wu D, Sussman DJ (2000) Protein phosphatase 2Calpha dephosphorylates axin and activates LEF-1-dependent transcription. *J Biol Chem* **275**: 2399-2403

**4)** Fukumoto S, Hsieh CM, Maemura K, Layne MD, Yet SF, Lee KH, Matsui T, Rosenzweig A, Taylor WG, Rubin JS, Perrella MA, Lee, M.E. (2001) Akt participation in the Wnt signaling pathway through Dishevelled. *J Biol Chem* **276**: 17479-17483

**5)** Song DH, Sussman DJ, Seldin DC (2000) Endogenous protein kinase CK2 participates in Wnt signaling in mammary epithelial cells. *J Biol Chem* **275**: 23790-23797

**6)** Liu X, Rubin JS, Kimmel AR (2005) Rapid, Wnt-induced changes in GSK3beta associations that regulate beta-catenin stabilization are mediated by Galpha proteins. *Curr Biol* **15**: 1989-1997

**Supplementary Table 5: True positive and corresponding maximum false positive rates for CPS, LUMIER, cDNA and RNAi**

| True Positive Rate | False Positive Rate for: |        |       |       | Representative CP Score |
|--------------------|--------------------------|--------|-------|-------|-------------------------|
|                    | CPS                      | LUMIER | cDNA  | RNAi  |                         |
| 0.421              | 0.000                    | 0.000  | 0.000 | 0.210 | 25.48                   |
| 0.526              | 0.000                    | 0.015  | 0.000 | 0.350 | 24.02                   |
| 0.632              | 0.000                    | 0.055  | 0.035 | 0.445 | 21.27                   |
| 0.737              | 0.000                    | 0.090  | 0.060 | 0.465 | 20.36                   |
| 0.789              | 0.005                    | 0.130  | 0.065 | 0.490 | 18.92                   |
| 0.842              | 0.015                    | 0.575  | 0.135 | 0.520 | 18.03                   |
| 0.895              | 0.025                    | 0.760  | 0.365 | 0.520 | 15.30                   |
